# Supplementary material for: A base measure of precision for protein stability predictors: structural sensitivity
Source: PubMed Central journal article supplement (PMC7908712; doi:10.1186/s12859-021-04030-w), 2021-02-25
Supplement: 12859_2021_4030_MOESM1_ESM.pdf [file 12859_2021_4030_MOESM1_ESM.pdf]

## Supplementary information

# **A Base Measure of Precision for Protein Stability Predictors: Structural Sensitivity**

**Octav Caldararu<sup>1</sup>, Tom L. Blundell<sup>2</sup>, and Kasper P. Kepp<sup>1\*</sup>**

<sup>1</sup> *DTU Chemistry, Technical University of Denmark, Building 206, 2800 Kgs. Lyngby, Denmark.*

<sup>2</sup> *Department of Biochemistry, University of Cambridge, Cambridge, CB2 1GA, United Kingdom.*

Correspondence: E-mail: [kpj@kemi.dtu.dk](mailto:kpj@kemi.dtu.dk). Tel: + +45 45252409

**Table S1.** All-atom root mean square deviation (in Å) between the original structures from the PDB and structures minimized with FoldX's module RepairPDB for all proteins in the study.

|       | PDB1  | PDB2  | PDB3  | PDB4  | PDB5  | Average |
|-------|-------|-------|-------|-------|-------|---------|
| BACE1 | 0.002 | 0.003 | 0.000 |       |       | 0.002   |
| CycA  | 0.000 | 0.000 | 0.000 |       |       | 0.000   |
| FCR   | 0.000 | 0.003 | 0.003 |       |       | 0.002   |
| GBC   | 0.003 | 0.009 | 0.003 |       |       | 0.005   |
| HPC   | 0.007 | 0.010 | 0.004 |       |       | 0.007   |
| HSA   | 0.003 | 0.003 | 0.003 |       |       | 0.003   |
| Lys   | 0.003 | 0.003 | 0.008 |       |       | 0.005   |
| Mlyz  | 0.001 | 0.011 | 0.004 |       |       | 0.005   |
| SPP   | 0.000 | 0.003 | 0.002 |       |       | 0.002   |
| Tgly  | 0.007 | 0.007 | 0.007 |       |       | 0.007   |
| TLL   | 0.000 | 0.001 | 0.000 |       |       | 0.000   |
| TRR   | 0.000 | 0.000 | 0.000 |       |       | 0.000   |
| TST1  | 0.001 | 0.001 | 0.004 |       |       | 0.002   |
| Thm   | 0.000 | 0.000 | 0.000 |       |       | 0.000   |
| Uglc  | 0.001 | 0.000 | 0.002 | 0.001 |       | 0.001   |
| Aamy  | 0.000 | 0.000 | 0.000 |       |       | 0.000   |
| Blac  | 0.000 | 0.000 | 0.001 |       |       | 0.000   |
| Bar   | 0.000 | 0.001 | 0.004 | 0.003 |       | 0.002   |
| BPTI  | 0.001 | 0.004 | 0.000 |       |       | 0.002   |
| CAH   | 0.001 | 0.001 | 0.001 | 0.000 | 0.000 | 0.001   |
| FGF   | 0.001 | 0.000 | 0.003 | 0.002 |       | 0.002   |
| Hem   | 0.001 | 0.001 | 0.000 | 0.001 |       | 0.001   |
| Lyz   | 0.007 | 0.000 | 0.000 | 0.001 | 0.002 | 0.002   |
| Rnase | 0.004 | 0.001 | 0.000 | 0.001 | 0.000 | 0.001   |
| UBQ   | 0.002 | 0.000 | 0.002 | 0.001 | 0.000 | 0.001   |

**Table S2.** Structural sensitivity per protein (in kcal/mol) for each protein and each prediction method.

|         | PopMusic | CUPSAT | mCSM | FoldX | Maestro | I-Mutant | Average | STDEV |
|---------|----------|--------|------|-------|---------|----------|---------|-------|
| BACE1   | 0.11     | 0.67   | 0.06 | 0.57  | 0.19    | 0.04     | 0.27    | 0.27  |
| CycA    | 0.08     | 0.59   | 0.42 | 0.48  | 0.09    | 0.04     | 0.28    | 0.24  |
| FCR     | 0.14     | 1.07   | 0.10 | 0.80  | 0.14    | 0.06     | 0.38    | 0.44  |
| GBC     | 0.08     | 0.65   | 0.10 | 0.48  | 0.07    | 0.03     | 0.24    | 0.26  |
| HPC     | 0.18     | 1.13   | 0.10 | 0.66  | 0.14    | 0.03     | 0.37    | 0.43  |
| HSA     | 0.09     | 1.00   | 0.06 | 1.24  | 0.03    | 0.04     | 0.41    | 0.56  |
| Lys     | 0.11     | 0.83   | 0.13 | 0.59  | 0.42    | 0.03     | 0.35    | 0.32  |
| Mlyz    | 0.16     | 1.00   | 0.07 | 0.85  | 0.15    | 0.05     | 0.38    | 0.43  |
| SPP     | 0.39     | 0.73   | 0.31 | 0.78  | 0.29    | 0.03     | 0.42    | 0.29  |
| Tgly    | 0.02     | 0.51   | 0.01 | 0.41  | 0.01    | 0.01     | 0.16    | 0.23  |
| TLL     | 0.16     | 0.80   | 0.10 | 0.67  | 0.12    | 0.06     | 0.32    | 0.33  |
| TRR     | 0.07     | 0.32   | 0.04 | 1.19  | 0.05    | 0.02     | 0.28    | 0.46  |
| TST1    | 0.10     | 0.79   | 0.08 | 0.46  | 0.08    | 0.03     | 0.26    | 0.31  |
| Thm     | 0.42     | 0.63   | 0.39 | 0.46  | 0.30    | 0.03     | 0.37    | 0.20  |
| Uglc    | 0.13     | 0.91   | 0.08 | 0.52  | 0.12    | 0.05     | 0.30    | 0.35  |
| Aamy    | 0.09     | 0.56   | 0.06 | 0.52  | 0.06    | 0.03     | 0.22    | 0.25  |
| Blac    | 0.09     | 1.09   | 0.06 | 0.25  | 0.10    | 0.06     | 0.27    | 0.41  |
| Bar     | 0.07     | 0.84   | 0.07 | 0.50  | 0.13    | 0.04     | 0.28    | 0.32  |
| BPTI    | 0.14     | 0.87   | 0.09 | 0.45  | 0.07    | 0.06     | 0.28    | 0.32  |
| CAH     | 0.11     | 0.68   | 0.09 | 0.41  | 0.08    | 0.04     | 0.23    | 0.26  |
| FGF     | 0.13     | 1.13   | 0.01 | 0.48  | 0.11    | 0.03     | 0.32    | 0.43  |
| Hem     | 0.11     | 1.10   | 0.05 | 0.52  | 0.08    | 0.04     | 0.32    | 0.43  |
| Lyz     | 0.16     | 0.99   | 0.29 | 0.77  | 0.14    | 0.04     | 0.40    | 0.39  |
| Rnase   | 0.16     | 1.00   | 0.18 | 0.50  | 0.12    | 0.07     | 0.34    | 0.36  |
| UBQ     | 0.11     | 0.76   | 0.38 | 0.61  | 0.18    | 0.06     | 0.35    | 0.28  |
| Average | 0.14     | 0.83   | 0.13 | 0.61  | 0.13    | 0.04     |         |       |
| STDEV   | 0.09     | 0.22   | 0.12 | 0.23  | 0.09    | 0.02     |         |       |

**Table S3.** ANOVA among structural sensitivities of all methods for each protein studied.

| SUMMARY       |              |            |                |                 |
|---------------|--------------|------------|----------------|-----------------|
| <i>Groups</i> | <i>Count</i> | <i>Sum</i> | <i>Average</i> | <i>Variance</i> |
| BACE1         | 6            | 1.92       | 0.27           | 0.06            |
| CycA          | 6            | 1.98       | 0.28           | 0.05            |
| FCR           | 6            | 2.69       | 0.38           | 0.16            |
| GBC           | 6            | 1.65       | 0.24           | 0.06            |
| HPC           | 6            | 2.61       | 0.37           | 0.16            |
| HSA           | 6            | 2.87       | 0.41           | 0.26            |
| Lys           | 6            | 2.47       | 0.35           | 0.08            |
| Mlyz          | 6            | 2.66       | 0.38           | 0.15            |
| SPP           | 6            | 2.96       | 0.42           | 0.07            |
| Tgly          | 6            | 1.13       | 0.16           | 0.05            |
| TLL           | 6            | 2.23       | 0.32           | 0.09            |
| TRR           | 6            | 1.98       | 0.28           | 0.17            |
| TST1          | 6            | 1.79       | 0.26           | 0.08            |
| Thm           | 6            | 2.60       | 0.37           | 0.03            |
| Uglc          | 6            | 2.10       | 0.30           | 0.10            |
| Aamy          | 6            | 1.53       | 0.22           | 0.05            |
| Blac          | 6            | 1.92       | 0.27           | 0.14            |
| Bar           | 6            | 1.93       | 0.28           | 0.09            |
| BPTI          | 6            | 1.97       | 0.28           | 0.09            |
| CAH           | 6            | 1.64       | 0.23           | 0.05            |
| FGF           | 6            | 2.21       | 0.32           | 0.16            |
| Hem           | 6            | 2.21       | 0.32           | 0.15            |
| Lyz           | 6            | 2.79       | 0.40           | 0.12            |
| Rnase         | 6            | 2.36       | 0.34           | 0.11            |
| UBQ           | 6            | 2.46       | 0.35           | 0.07            |

| ANOVA                      |           |           |           |          |                |               |
|----------------------------|-----------|-----------|-----------|----------|----------------|---------------|
| <i>Source of Variation</i> | <i>SS</i> | <i>df</i> | <i>MS</i> | <i>F</i> | <i>P-value</i> | <i>F crit</i> |
| Between Groups             | 0.72      | 24        | 0.03      | 0.29     | 1.00           | 1.59          |
| Within Groups              | 15.54     | 150       | 0.10      |          |                |               |
|                            |           |           |           |          |                |               |
| Total                      | 16.27     | 174       |           |          |                |               |

**Table S4.** List of proteins containing predicted cysteine bridges (according to DisulfideByDesign 2.0) and proteins containing no predicted cysteine bridges.

|                      | Proteins                                                                    |
|----------------------|-----------------------------------------------------------------------------|
| With Cystine Bridges | Lyz, BLac, AAmy, BPTI, Rnase, FCR, HPC, HSA, MLyz, SPP, TGly, TRR, Thm, TLL |
| No Cystine Bridges   | FGF, Bar, UBQ, CAH, Hem, BACE1, CycA, GBC, Lys, TST1, UGlc                  |

**Table S5.** Average structural sensitivity per protein for proteins belonging each CATH structure for the six prediction methods studied.

|                | PopMusic | CUPSAT | mCSM | FoldX | Maestro | I-Mutant |
|----------------|----------|--------|------|-------|---------|----------|
| $\alpha$       | 0.13     | 0.98   | 0.12 | 0.79  | 0.16    | 0.04     |
| $\beta$        | 0.15     | 0.81   | 0.16 | 0.53  | 0.14    | 0.04     |
| $\alpha+\beta$ | 0.12     | 0.80   | 0.12 | 0.59  | 0.11    | 0.05     |
| NoSS           | 0.46     | 1.17   | 0.36 | 1.01  | 0.33    | 0.06     |

**Table S6.** Pearson correlation coefficient of the structural sensitivity per protein for each method against various global parameters of the structures used.

|        | PopMusic | CUPSAT | mCSM  | FoldX | Maestro | I-Mutant |
|--------|----------|--------|-------|-------|---------|----------|
| Length | -0.22    | 0.24   | -0.48 | 0.13  | -0.17   | 0.01     |
| RMSD   | 0.12     | 0.07   | 0.04  | 0.19  | 0.05    | 0.00     |

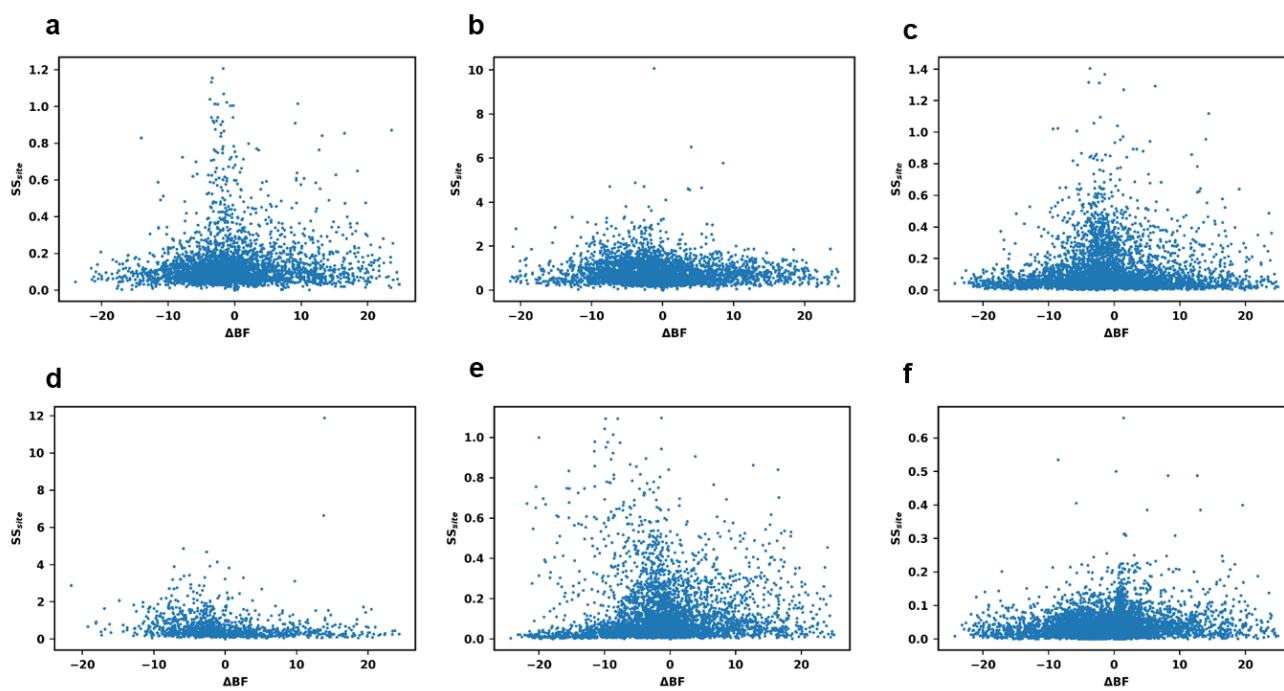

**Figure S1.** Structural sensitivity per site (in kcal/mol) vs  $\Delta$ B-factor (the difference between the average residue B-factor and the average B-factor per protein) among all residues in all 25 proteins for: (a) PoPMuSiC; (b) CUPSAT; (c) mCSM; (d) FoldX; (e) Maestro and (f) I-Mutant.

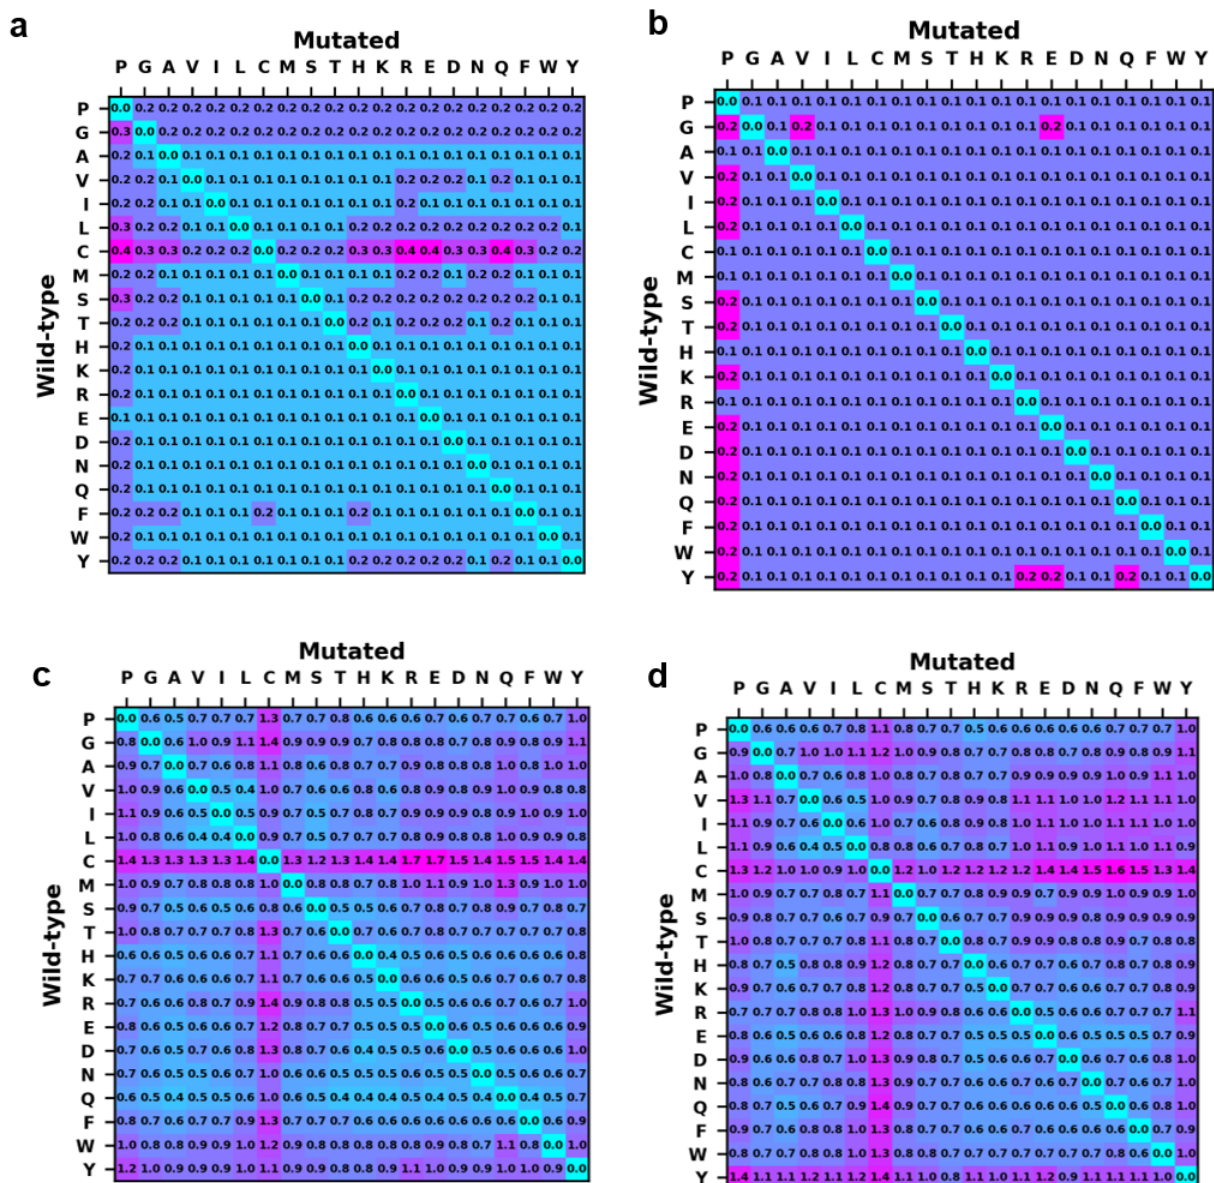

**Figure S2.** Structural sensitivity per mutation (in kcal/mol) for all mutations of a certain mutation type for (a) PoPMuSiC, on a dataset containing only proteins which contain predicted cystine bridges; (b) PoPMuSiC, on a dataset containing only proteins which do not contain any predicted cystine bridges; (c) CUPSAT; on a dataset containing only proteins which contain predicted cystine bridges; (d) CUPSAT; on a dataset containing only proteins which do not contain any predicted cystine bridges.
